# Supplementary material
Source: PubMed Central journal article supplement (PMC507882)
Supplement: gb-2004-5-8-r57-s1.pdf [file gb-2004-5-8-r57-s1.pdf]

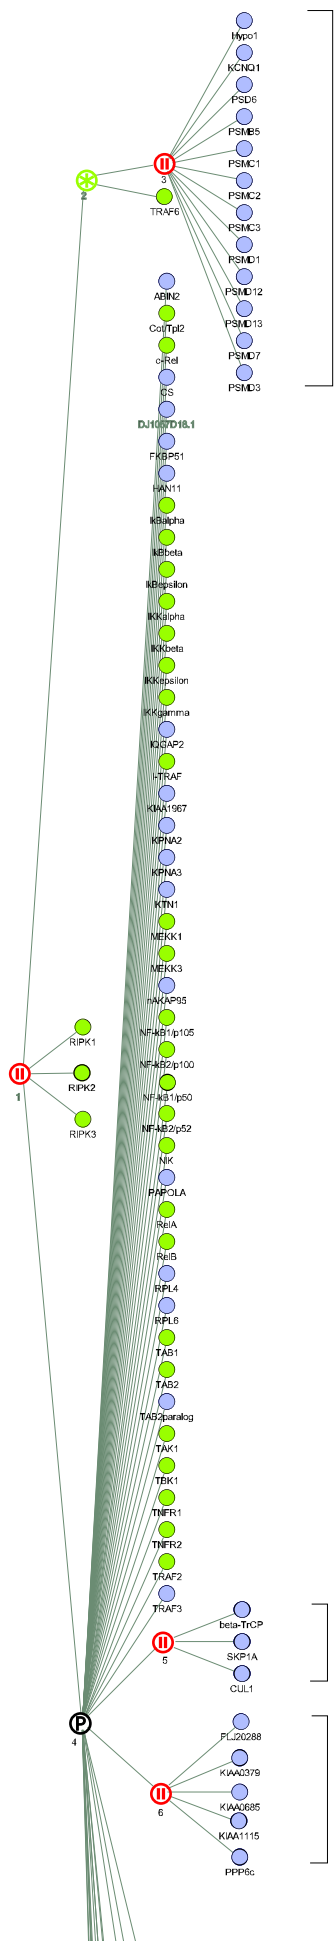

"S2" : neighbors of TRAF6

"M3" : neighbors of IκB-α, IκB-β, IκB-ε

"S5" : neighbors of IκB-ε

### Legend

- Protein selected for purification (bait)
- Protein not selected for purification
- ✳ Series module
- Ⓜ Parallel module
- Ⓟ Prime module

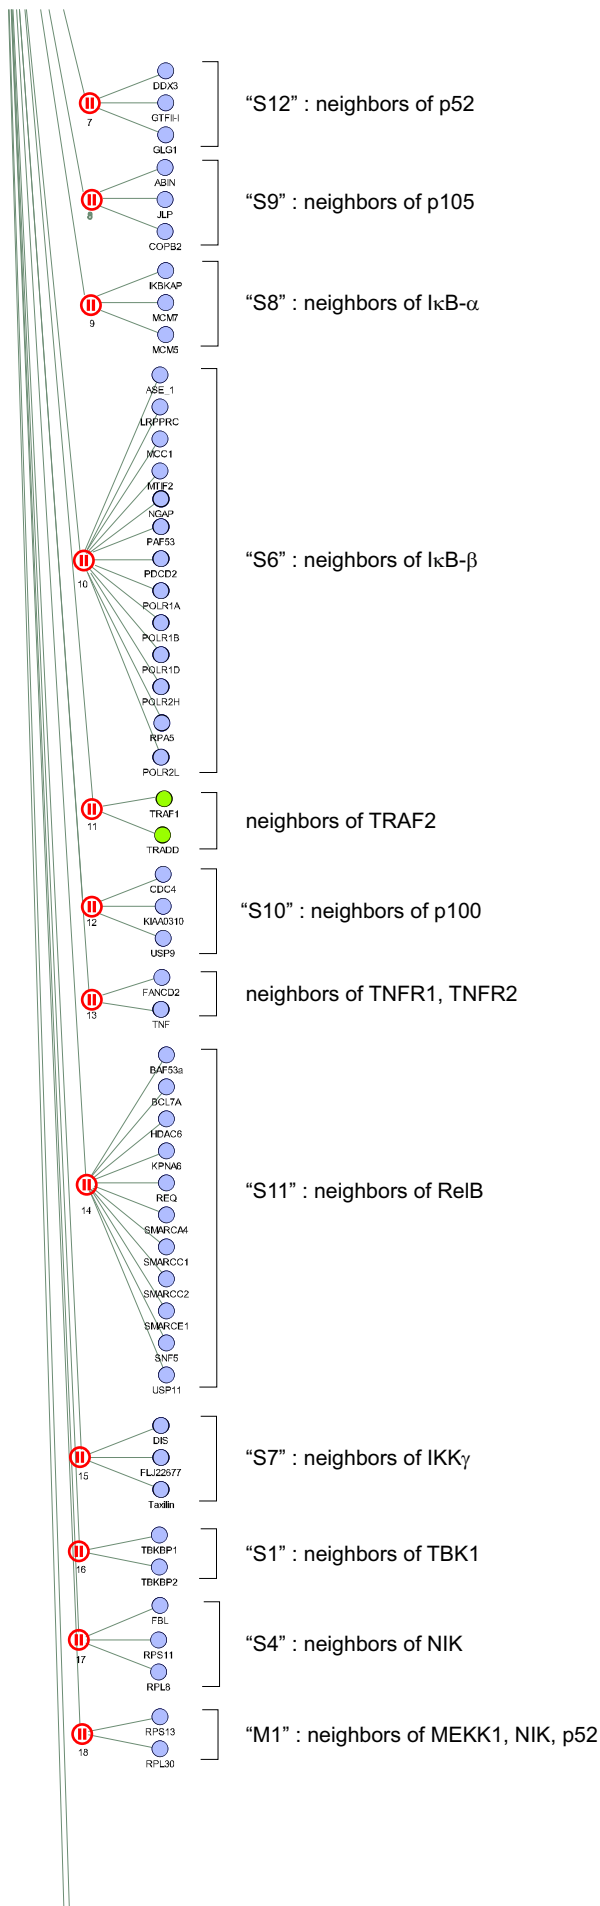

### Legend

- Protein selected for purification (bait)
- Protein not selected for purification
- ⊗ Series module
- Ⓜ Parallel module
- Ⓟ Prime module

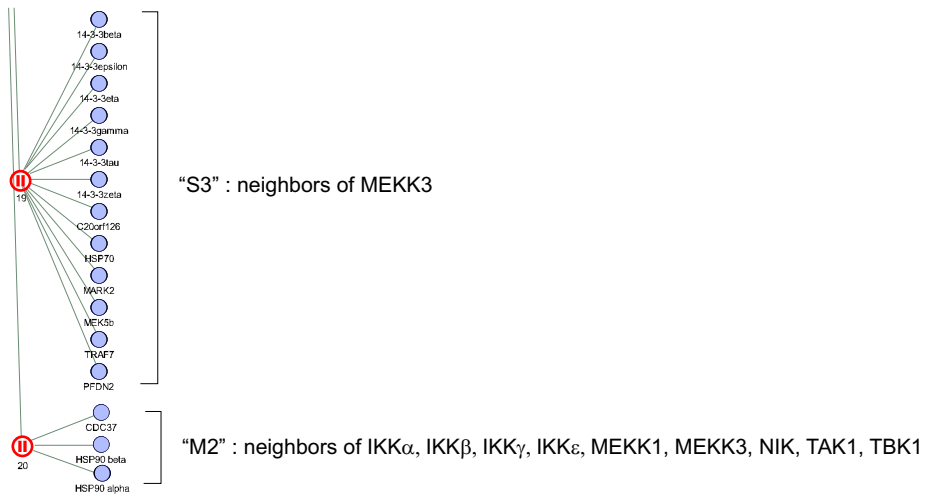

### Legend

- Protein selected for purification (bait)
- Protein not selected for purification
- ⊗ Series module
- Ⓜ Parallel module
- Ⓟ Prime module
